# Supplementary material for: Novel Oliveros-like Clade C Mammarenaviruses from Rodents in Argentina, 1990–2020
Source: MDPI journal article supplement (doi:10.3390/v16030340), 2024-02-22
Supplement: s1 [file s1]

Supplemental Figures and Tables

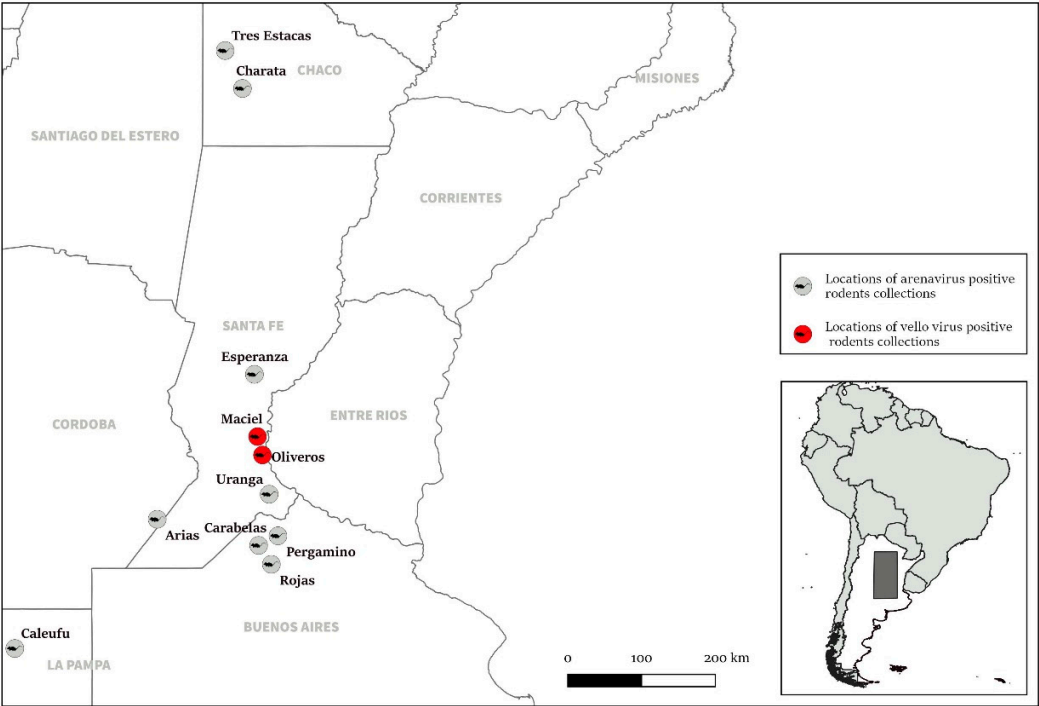

**Figure S1.** Distribution of rodent surveillance in Argentina between 1990 and 2019.

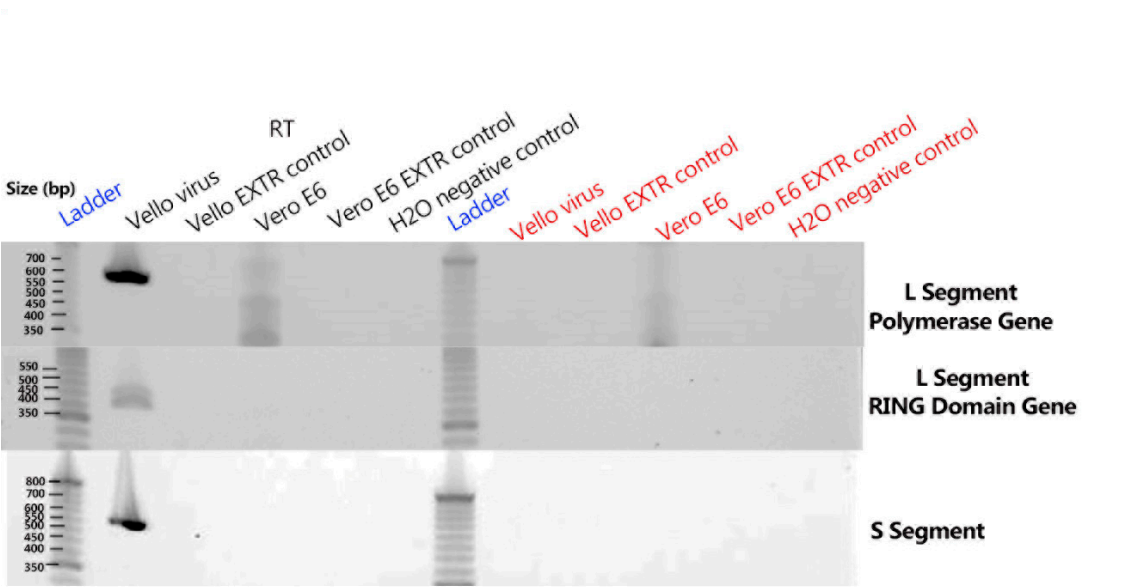

**Figure S2.** RT-PCR confirms the presence of the Vello virus genome. Amplicons were generated from the L segment - Polymerase gene (top), and RING domain gene (middle) and S segment (bottom). Amplicon sizes for the Polymerase gene, RING domain gene, and S segment were 642bp, 441bp, and 559bp

respectively. Reactions were repeated with an inactivated reverse transcriptase (indicated by “NO RT”) to confirm that amplicons were from viral RNA and not a DNA template.

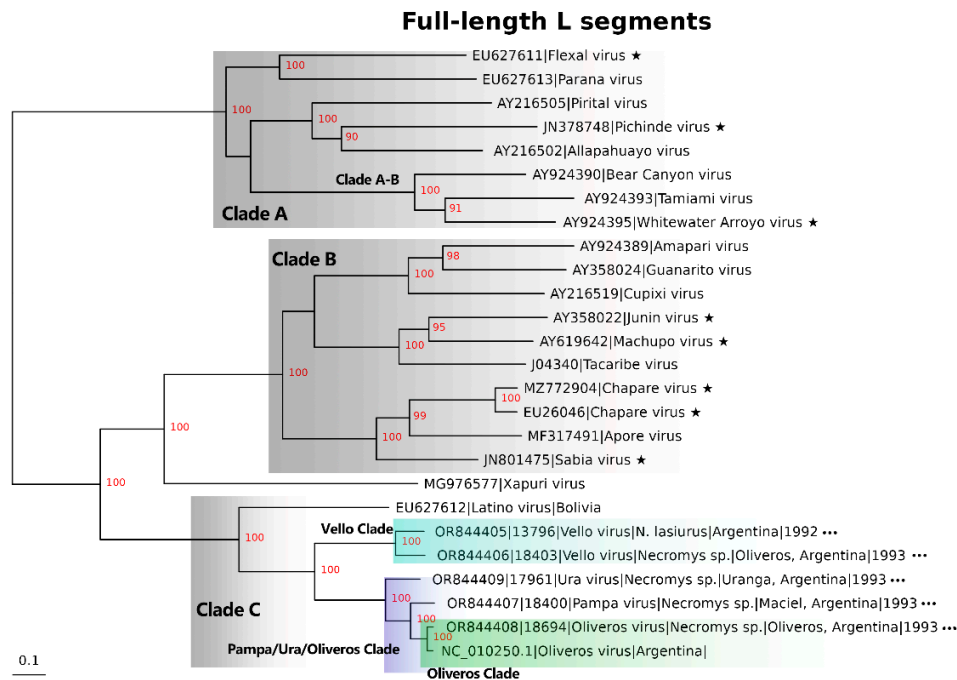

**Figure S3:** Inferred nucleotide-based phylogenetic relationships generated by maximum likelihood using full-length L segments belonging to all known New World viral genomes within the *Mammarenavirus* genus. Major clades are labeled, trees are midpoint rooted, and bootstrap support (n=1000 iterations) is highlighted in red on each node. Black stars indicate NW *Mammarenaviruses* known to cause human infections. Three dots indicate sequences generated in this work.

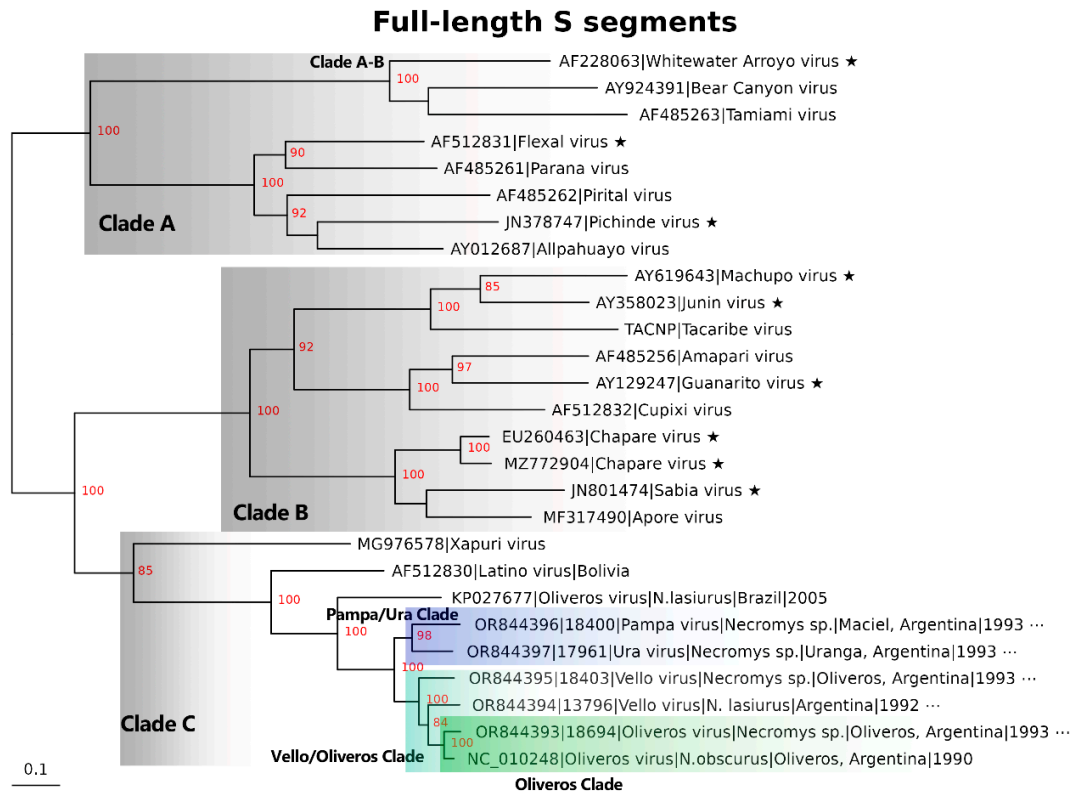

**Figure S4:** Inferred nucleotide-based phylogenetic relationships generated by maximum likelihood using full-length S segments belonging to all known New World viral genomes within the *Mammarenavirus* genus. Major clades are labeled, trees are midpoint rooted, and bootstrap support (n=1000 iterations) is highlighted in red on each node. Black stars indicate NW *Mammarenaviruses* known to cause human infections. Three dots indicate sequences generated in this work.

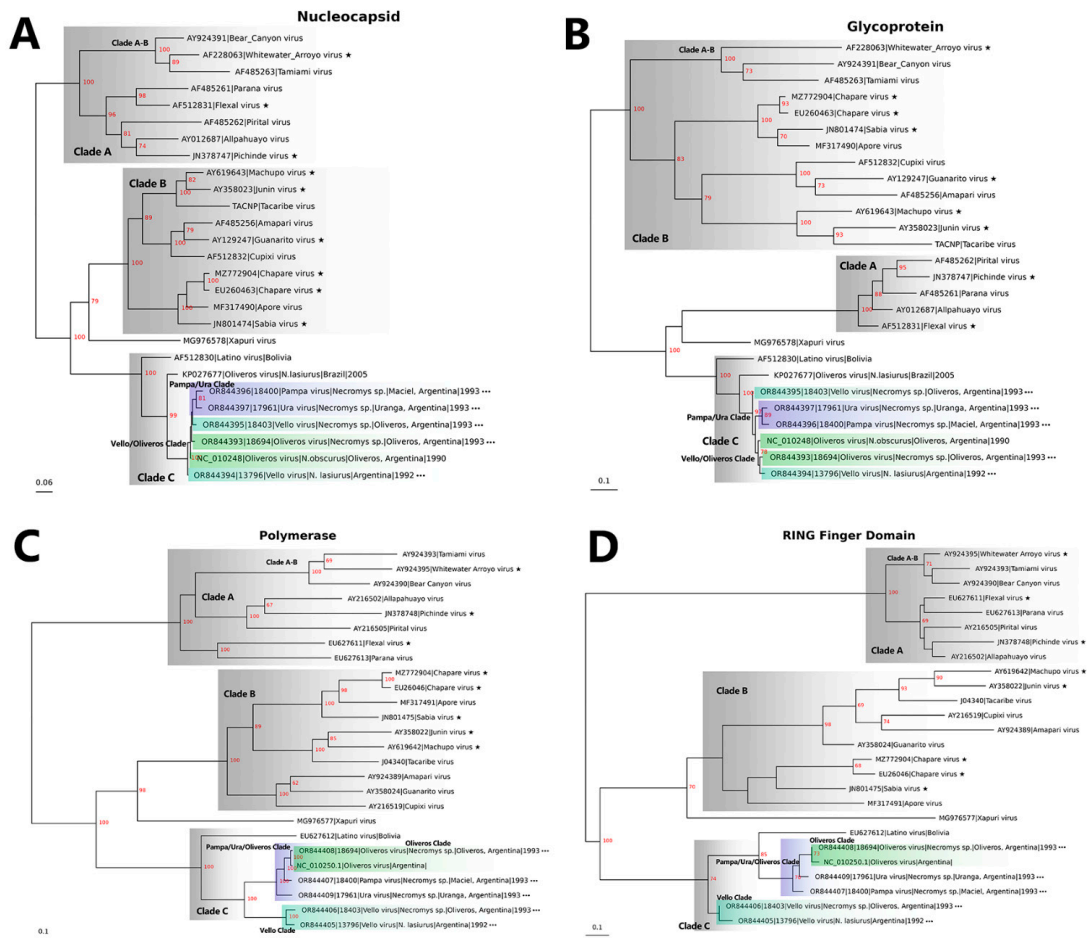

**Figure S5:** Inferred amino acid-based phylogenetic relationships generated by maximum likelihood using full-length S and L segments belonging to all known New World viral genomes within the *Mammarenavirus* genus. Trees based on the translations of the coding region for the nucleocapsid protein (panel A), glycoprotein (panel B), polymerase (panel C), and RING domain (panel D) are outlined. Major clades are labeled, trees are midpoint rooted, and bootstrap support (n=1000 iterations) is highlighted in red on each node. Black stars indicate NW *Mammarenaviruses* known to cause human infections. Three dots indicate sequences generated in this work.

**Table S1.** Comparison of L segment nucleotide percent identity between full-length Clade C *Mammarenavirus* sequences generated at Argentine National Institute of Human Viral Diseases (green) and Centers for Disease Control and Prevention (blue).

|                       | Oliveros virus, 18694                      | Vello virus, 13796 | Oliveros virus, 18403 | Pampa virus, 18400 | Ura virus, 17961 | C<br>D<br>C |
|-----------------------|--------------------------------------------|--------------------|-----------------------|--------------------|------------------|-------------|
| Oliveros virus, 18694 | 99.80%                                     |                    |                       |                    |                  |             |
| Vello virus, 13796    |                                            | 99.70%             |                       |                    |                  |             |
| Oliveros virus, 18403 |                                            |                    | 99.60%                |                    |                  |             |
| Pampa virus, 18400    |                                            |                    |                       | 99.30%             |                  |             |
| Ura virus, 17961      |                                            |                    |                       |                    | 100%             |             |
| INEVH                 | Full L-segment nucleotide percent identity |                    |                       |                    |                  |             |

**Table S2.** Comparison of S segment nucleotide percent identity between full-length Clade C *Mammarenavirus* sequences generated at Argentine National Institute of Human Viral Diseases (green) and Centers for Disease Control and Prevention (blue).

|                       | Oliveros virus, 18694                      | Vello virus, 13796 | Vello virus, 18403 | Pampa virus, 18400 | Ura virus, 17961 | C<br>D<br>C |
|-----------------------|--------------------------------------------|--------------------|--------------------|--------------------|------------------|-------------|
| Oliveros virus, 18694 | 99.96%                                     |                    |                    |                    |                  |             |
| Vello virus, 13796    |                                            | 100%               |                    |                    |                  |             |
| Vello virus, 18403    |                                            |                    | 99.90%             |                    |                  |             |
| Pampa virus, 18400    |                                            |                    |                    | -                  |                  |             |
| Ura virus, 17961      |                                            |                    |                    |                    | 96.40%           |             |
| INEVH                 | Full S-segment nucleotide percent identity |                    |                    |                    |                  |             |

**Table S3.** Summary of *Mammarenavirus*-positive specimens

| RNA ID | Species             | Locality     | Year Captured | Tissue type          | Diagnosis method  | Diagnostic result | Next generation Result |            | Sanger S segment |        | Sequence number (F-R) |
|--------|---------------------|--------------|---------------|----------------------|-------------------|-------------------|------------------------|------------|------------------|--------|-----------------------|
|        |                     |              |               |                      |                   |                   | S coverage             | L coverage |                  |        |                       |
| 809227 | Necromys lasiurus   | Unknown      | 1992          | Unknown              | ELISA and NGS     | Positive          | 100%                   | 97.80%     |                  |        |                       |
| 3335   | Necromys sp.        | Tres Estacas | 2014          | Lung                 | 16V-19C (primers) | Positive          | 0%                     | 0%         | 16.80%           |        | 4273-4274             |
| 1353   | Akodon dolores      | Caleufú      | 2013          | Blood w/o heparin    | 16V-19C (primers) | Positive          | 0%                     | 0%         | 16.70%           |        | 3795                  |
| 1343   | Necromys benefactus | Caleufú      | 2013          | Blood w/o heparin    | 16V-19C (primers) | Positive          | 0%                     | 0%         | 4.80%            | 16.80% | 3790-3791             |
| 3414   | Necromys sp.        | Maciel       | 1993          | 10% Brain suspension | ELISA             | Positive          | 99.80%                 | 100%       |                  |        |                       |
| 3400   | Necromys sp.        | Arias        | 2019          | Brain                | ELISA             | Positive          | 0%                     | 59.20%     |                  |        |                       |
| 125    | Necromys sp.        | Uranga       | 1993          | 10% Brain suspension | 16V-19C (primers) | Positive          | 100%                   | 99.90%     | 16.1             |        | 802-803               |
| 36     | Necromys sp.        | Oliveros     | 1993          | 10% Brain suspension | 16V-19C (primers) | Positive          | 99.90%                 | 35.60%     | 16.8             |        | 790-791               |
| 92     | Necromys sp.        | Oliveros     | 1993          | 10% Brain suspension | 16V-19C (primers) | Positive          | 99.9                   | 100.00%    |                  |        |                       |
| 91     | Necromys benefactus | Rojas        | 1993          | 10% Brain suspension | 16V-19C (primers) | Positive          | 0%                     | 0%         | 14.7             |        | 972                   |
| 90     | Necromys benefactus | Pergamino    | 1993          | 10% Brain suspension | 16V-19C (primers) | Positive          | 0%                     | 0%         | 16%              |        | 948                   |
| 88     | Necromys benefactus | Pergamino    | 1992          | 10% Brain suspension | 16V-19C (primers) | Positive          | 0%                     | 0%         | 16.70%           |        | 946                   |
| 1354   | Akodon dolores      | Caleufú      | 2013          | Blood w/o heparin    | 16V-19C (primers) | Positive          | 0%                     | 0%         |                  | 6.3    | 3247                  |
| 81     | Necromys benefactus | Oliveros     | 1993          | Blood 14 dpi         | 16V-19C (primers) | Positive          | 0%                     | 0%         |                  |        |                       |
| 1541   | Akodon sp.          | Charata      | 2013          | Blood w/o heparin    | 142LAT-930LAT (p) | Positive          | 0%                     | 0%         |                  |        |                       |
| 3408   | Necromys sp         | Oliveros     | 1999          | Brain                | ELISA + JUNV      | Positive          | 0%                     | 0%         |                  |        |                       |
| 3397   | Necromys sp         | Esperanza    | 2017          | Brain                | ELISA + JUNV      | Positive          | 0%                     | 0%         |                  |        |                       |
| 3398   | Necromys sp.        | Esperanza    | 2017          | Brain                | ELISA + JUNV      | Positive          | 0%                     | 0%         |                  |        |                       |
| 3399   | Necromys sp         | Esperanza    | 2017          | Brain                | ELISA + JUNV      | Positive          | 0%                     | 0%         |                  |        |                       |
| 3400   | Necromys sp         | Carabelas    | 2020          | Brain                | ELISA + JUNV      | Positive          | 0%                     | 0%         |                  |        |                       |
| 3401   | Necromys sp         | Carabelas    | 2020          | Brain                | ELISA + JUNV      | Positive          | 0%                     | 0%         |                  |        |                       |
| 3402   | Necromys sp         | Carabelas    | 2020          | Brain                | ELISA + JUNV      | Positive          | 0%                     | 0%         |                  |        |                       |
| 3403   | Necromys sp         | Carabelas    | 2020          | Brain                | ELISA + JUNV      | Positive          | 0%                     | 0%         |                  |        |                       |
| 3404   | Necromys sp         | Carabelas    | 2020          | Brain                | ELISA + JUNV      | Positive          | 0%                     | 0%         |                  |        |                       |
| 3405   | Necromys sp         | Carabelas    | 2020          | Brain                | ELISA + JUNV      | Positive          | 0%                     | 0%         |                  |        |                       |
| 3406   | Necromys sp         | Carabelas    | 2020          | Brain                | ELISA + JUNV      | Positive          | 0%                     | 0%         |                  |        |                       |

**Table S4.** Comparison of Vello virus *in vitro* sequence compared to Vello virus *in silico* sequence.

| Amplicon               | Nucleotide       |                  | Amino acid       |                    |
|------------------------|------------------|------------------|------------------|--------------------|
|                        | Percent Identity | Percent Identity | Percent Identity | Percent Similarity |
| <i>S-segment</i>       | 100%             | 100%             | 100%             | 100%               |
| <i>Polymerase gene</i> | 99.6%            | 100%             | 100%             | 100%               |



**Table S6.** Comparison of S segment nucleotide percent identity (bottom) and NP amino acid percent identity (top) between full-length Clade C *Mammarenavirus* sequences. Red highlighting indicates a percent similarity below the ICTV threshold for *Mammarenavirus* species demarcation.

[illegible]
